# Supplementary material for: Lepidium sativum Sprouts Grown under Elevated CO2 Hyperaccumulate Glucosinolates and Antioxidants and Exhibit Enhanced Biological and Reduced Antinutritional Properties
Source: MDPI journal article supplement (doi:10.3390/biom11081174), 2021-08-09
Supplement: s1 [file s1]

**Supplementary Table S1:** A two-way ANOVA for the effect of CO<sub>2</sub> levels, cultivars of and their interaction on the assessed parameters in *Lepidium sativum* sprouts (numbers represent F values; ns, non-significant; \*, P < 0.05; \*\*, P < 0.01; \*\*\*, P < 0.001).

| Parameters             | Treatment (T) | Cultivar (C) | T X C     |
|------------------------|---------------|--------------|-----------|
| Fresh weight           | 58.215***     | 19.848***    | 3.156ns   |
| Total Chlorophyll      | 69.492***     | 8.86**       | 16.849*** |
| Alanine                | 0.159ns       | 7.74**       | 1.16ns    |
| Leucine                | 2.794ns       | 1.116ns      | 2.463ns   |
| Isoleucine             | 0.22ns        | 3.939*       | 1.345ns   |
| Valine                 | 46.976***     | 22.305***    | 11.863**  |
| Methionine             | 67.917***     | 0.31ns       | 3.96*     |
| Phenylalanine          | 48.805***     | 33.065***    | 5.52*     |
| Tyrosine               | 4.98*         | 1.079ns      | 0.401ns   |
| Tryptophan             | 181.046***    | 47.624***    | 12.326**  |
| Glucotropaeolin        | 89.678***     | 18.878***    | 2.199ns   |
| Total glucosinolates   | 126.742***    | 5.747*       | 5.918*    |
| Benzaldehyde           | 22.962***     | 0.725ns      | 0.27ns    |
| Benzyl cyanide         | 110.348***    | 20.485***    | 0.395ns   |
| Benzyl thiocyanate     | 132.001***    | 2.156ns      | 5.108*    |
| Benzyl isothiocyanate  | 101.374***    | 34.907***    | 7.973**   |
| Myrosinase             | 202.48***     | 103.932***   | 23.185*** |
| Xanthophylls           | 131.716***    | 1.903ns      | 1.255ns   |
| Zeaxanthin             | 10.089**      | 6.256*       | 2.161ns   |
| Lutein                 | 1.372ns       | 13.164**     | 0.62ns    |
| Carotene               | 72.155***     | 31.022***    | 68.873*** |
| Caffeic acid           | 3.263ns       | 0.443ns      | 0.019ns   |
| Ferulic acid           | 13.263**      | 0.331ns      | 0.004ns   |
| Protocatechuic acid    | 8.241*        | 0.219ns      | 0.087ns   |
| Catechin               | 3.142ns       | 0.811ns      | 0.247ns   |
| Galic acid             | 3.242ns       | 1.823ns      | 0.097ns   |
| p-Coumaric acid        | 1.955ns       | 0.021ns      | 0.062ns   |
| Resorcinol             | 3.736ns       | 0.064ns      | 0.09ns    |
| B-hydroxy benzoic acid | 3.18ns        | 1.65ns       | 0.095ns   |
| Chlorogenic acid       | 3.122ns       | 0.364ns      | 0.02ns    |
| Syringic acid          | 0.567ns       | 0.026ns      | 0.092ns   |
| Vanilic acid           | 0.188ns       | 0.08ns       | 0.026ns   |
| Quercetin              | 14.801**      | 0.176ns      | 0.061ns   |
| Quercetrin             | 8.54*         | 0.419ns      | 0.57ns    |
| Luteolin               | 28.307***     | 0.333ns      | 0.096ns   |
| Apigenin               | 4.355ns       | 0.081ns      | 0.042ns   |
| Isoquercetrin          | 8.7*          | 0.726ns      | 0.208ns   |
| Rutin                  | 10.878**      | 0.619ns      | 0.168ns   |

|                                   |             |           |           |
|-----------------------------------|-------------|-----------|-----------|
| Ellagic acid                      | 46.943***   | 0.604ns   | 0.209ns   |
| Velutin                           | 21.377***   | 0.289ns   | 0.174ns   |
| Phenols                           | 49.999***   | 2.768ns   | 10.189**  |
| Flavonoids                        | 59.598***   | 1.904ns   | 0.549ns   |
| PAL                               | 469.272***  | 14.496**  | 2.217ns   |
| Antioxidant activity              |             |           |           |
| FRAP                              | 44.243***   | 0.883ns   | 0.233ns   |
| ABTS                              | 10.354**    | 9.496**   | 2.358ns   |
| DPPH                              | 24.051***   | 0.908ns   | 1.965ns   |
| Anti-Inflammatory activity        |             |           |           |
| Anti-cyclooxygenase-2             | 19.513***   | 46.747*** | 10.828**  |
| Anti-lipoxygenase                 | 152.183***  | 6.308*    | 1.38ns    |
| Hypocholesterolemic activity      |             |           |           |
| Inhibition of micellar solubility | 26.637***   | 0.146ns   | 1.806ns   |
| Anti-lipase                       | 1195.932*** | 94.906*** | 40.308*** |
| Anti-amylase                      | 185.251***  | 41.888*** | 42.81***  |
| Anti-cancer activity              |             |           |           |
| Hepatocellular carcinoma          | 23.376***   | 2.353ns   | 0.126ns   |
| Colon carcinoma                   | 0.002ns     | 8.938**   | 2.79ns    |
| Embryonic kidney adenocarcinoma   | 51.026***   | 3.786ns   | 8.606**   |
| Urinary bladder carcinoma         | 158.109***  | 1.26ns    | 4.351*    |
| Anti-bacterial activity           |             |           |           |
| <i>Streptococcus</i> sp.          | 1861.145*** | 51.015*** | 13.897*** |
| <i>Escherichia coli</i>           | 80.593***   | 19.403*** | 61.337*** |
| <i>Bacillus subtilis</i>          | 140.773***  | 54.668*** | 35.191*** |
| <i>Pseudomonas aeruginosa</i>     | 421.357***  | 3.149**   | 27.12***  |
| <i>Sarcina lutea</i>              | 192.555***  | 17.848*** | 31.489*** |

**Supplementary Table S2:** Levels of antioxidant metabolites, glucosinolates, their amino acid precursors and activities of phenylalanine ammonia lyase (PAL) and myrosinase in the sprouts of three *Lepidium sativum* cultivars grown under either aCO<sub>2</sub> (410 µmol CO<sub>2</sub> mol<sup>-1</sup> air; control) or eCO<sub>2</sub> (620 µmol CO<sub>2</sub> mol<sup>-1</sup> air).

| Parameters                                                   | aCO <sub>2</sub> |              |              | eCO <sub>2</sub> |              |               |
|--------------------------------------------------------------|------------------|--------------|--------------|------------------|--------------|---------------|
|                                                              | Haraz            | Rajab        | Khider       | Haraz            | Rajab        | Khider        |
| <b>Amino acid precursors of glucosinolates and phenolics</b> |                  |              |              |                  |              |               |
| Alanine                                                      | 2.75±0.22c       | 1.58±0.09b   | 1.12±0.07a   | 2.19±0.14B*      | 1.43±0.62A   | 1.52±0.16A*   |
| Leucine                                                      | 16.03±1.12a      | 19.26±1.9b   | 18.37±0.15ab | 24.8±1.23B*      | 15.72±6.6A*  | 25.45±1.77B*  |
| Isoleucine                                                   | 2.7±0.3a         | 2.58±0.23a   | 2.45±0.19a   | 3.14±0.1B*       | 2.67±0.2A    | 2.17±0.2A     |
| Valine                                                       | 8.67±4.4b        | 8.16±0.13b   | 3.09±0.18a   | 21.76±1.2B*      | 38±4.95C*    | 6.4±0.41A*    |
| Methionine                                                   | 13.25±1a         | 13.8±0.89a   | 17.3±0.6b    | 23.87±1.7A*      | 24.78±1.6A*  | 21.79±1.4A*   |
| Phenylalanine                                                | 6.55±3.3a        | 25.47±3.3b   | 7.67±0.05a   | 14.44±1.15A*     | 37.38±4.86B* | 11.99±1.68A*  |
| Tyrosine                                                     | 13.77±0.85c      | 9.95±0.28b   | 6.68±0.44a   | 18.37±2.27B*     | 22.52±1.67B* | 14.15±1.37A*  |
| Tryptophane                                                  | 3.41±0.22a       | 5.11±0.1b    | 5.78±0.43b   | 6.14±0.04A*      | 10.58±0.62B* | 8.36±0.12AB*  |
| <b>Glucosinolates and its hydrolysis</b>                     |                  |              |              |                  |              |               |
| Glucotropaeolin                                              | 0.96±0.01ab      | 0.69±0.16a   | 1.57±0.07c   | 1.89±0.18A*      | 1.72±0.09A*  | 2.16±0.04A*   |
| Total glucosinolates                                         | 46.6±0.9a        | 47.15±2.0a   | 69.6±1.2b    | 88.77±1.49A*     | 107.9±9.01A* | 97.75±6.76A   |
| Benzaldehyde (µg/g)                                          | 0.44±0.05a       | 0.42±0.02a   | 0.36±0.13a   | 1.06±0.24A*      | 1.11±0.23A*  | 0.84±0.07A*   |
| Benzyl cyanide (µg/g)                                        | 0.73±0.01b       | 0.56±0.01a   | 1.09±0.02c   | 1.53±0.1A*       | 1.35±0.03A*  | 2.04±0.21B*   |
| Benzyl thiocyanate (µg/g)                                    | 1.57±0.1a        | 1.66±0.09a   | 2.07±0.17b   | 4.48±0.3A*       | 3.48±0.3A*   | 3.63±0.2A*    |
| Benzyl isothiocyanate (µg/g)                                 | 3.87±0.08a       | 3.91±0.17a   | 5.77±0.1b    | 7.42±0.08B*      | 5.15±0.37A*  | 8.11±0.56B*   |
| <b>Myrosinase</b>                                            | 3.43±0.31a       | 4.92±0.25b   | 9.71±0.38c   | 7.13±0.36A*      | 12.56±0.2B*  | 12.2±0.5B*    |
| <b>Carotenoids</b>                                           |                  |              |              |                  |              |               |
| Carotene                                                     | 0.15±0.012a      | 0.20±0.00b   | 0.14±0.00a   | 0.20±0.01A*      | 0.26±0.02A*  | 0.50±0.04B*   |
| Lutein                                                       | 0.06±0.00a       | 0.09±0.00a   | 0.07±0.0a    | 0.06±0.01A       | 0.11±0.0B*   | 0.07±0.01AB   |
| Zeaxanthin                                                   | 0.001±0.0a       | 0.001±0.00a  | 0.002±0.0a   | 0.002±0.0A*      | 0.002±0.0A*  | 0.002±0.0A    |
| Xanthophylls                                                 | 0.038±0.00a      | 0.035±0.00a  | 0.041±0.00a  | 0.116±0.01B*     | 0.092±0.0A*  | 0.102±0.01AB* |
| <b>Phenolic compounds</b>                                    |                  |              |              |                  |              |               |
| Caffeic acid                                                 | 0.016±0.00a      | 0.013±0.00a  | 0.026±0.00b  | 0.02±0.01A*      | 0.021±0.01A* | 0.01A±0.00*   |
| Ferulic acid                                                 | 2.00±0.40a       | 2.33±0.47ab  | 3.53±0.40c   | 3.87±0.34B*      | 3.97±0.39B*  | 2.35±0.28A*   |
| Protocatechuic acid                                          | 1.091±0.21a      | 1.204±0.17ab | 1.729±0.34b  | 1.98±0.4B*       | 1.74±0.24B*  | 1.19±0.11A*   |
| Catechin                                                     | 0.521±0.1a       | 0.452±0.12a  | 0.832±0.16b  | 0.726±0.20A*     | 0.526±0.22A* | 0.424±0.05A*  |
| Galic acid                                                   | 13.51±2.7a       | 18.28±5.36ab | 21.62±4.3b   | 29.19±8.5B*      | 15.94±6.74AB | 10.02±1.2A*   |
| p-Coumaric acid                                              | 0.90±0.18a       | 0.85±0.25a   | 1.31±0.39b   | 1.3±0.14A*       | 1.16±0.19A*  | 0.92±0.10A*   |
| Resorcinol                                                   | 0.011±0.0a       | 0.013±0.0a   | 0.072±0.05a  | 0.048±0.02B*     | 0.066±0.05B* | 0.019±0.3A*   |
| p-hydroxy benzoic acid                                       | 18.021±3.6a      | 23.93±7.02ab | 28.68±5.92b  | 38.1±11.2B*      | 21.38±8.9AB  | 13.68±5.4A*   |

|                   |             |             |             |              |              |              |
|-------------------|-------------|-------------|-------------|--------------|--------------|--------------|
| Chlorogenic acid  | 3.97±0.79a  | 3.22±0.95a  | 3.152±1.3a  | 5.1±0.25A*   | 4.975±0.32A* | 6.30±0.12B*  |
| Syringic acid     | 0.54±0.15a  | 0.56±0.09a  | 0.507±0.11a | 0.588±0.11A  | 0.712±0.17B* | 0.702±0.10B* |
| Vanillic acid     | 0.83±0.24a  | 0.862±0.3a  | 0.94±0.32a  | 0.908±0.3A   | 1.1±0.52A*   | 0.903±0.21A  |
| Quercetin         | 1.196±0.24a | 1.075±0.27a | 2.94±0.59b  | 2.563±0.75B* | 2.518±0.61B* | 1.102±0.18A* |
| Quercitrin        | 0.086±0.01a | 0.096±0.03a | 0.136±0.02b | 0.199±0.06B* | 0.202±0.05B* | 0.066±0.02A* |
| Luteolin          | 0.029±0.01a | 0.029±0.01a | 0.071±0.01b | 0.08±0.01AB* | 0.085±0.01B* | 0.034±0.01A* |
| Apigenin          | 0.11±0.023a | 0.12±0.024a | 0.25±0.087b | 0.24±0.01B*  | 0.207±0.04B* | 0.11±0.02A*  |
| Isoquercetin      | 0.19±0.04a  | 0.18±0.03a  | 0.42±0.08b  | 0.381±0.04C* | 0.28±0.02B*  | 0.149±0.02A* |
| Rutin             | 0.83±0.16a  | 0.78±0.12a  | 2.18±0.13b  | 1.96±0.06C*  | 1.487±0.06B* | 0.62±0.26A*  |
| Ellagic acid      | 0.199±0.03a | 0.189±0.03a | 0.558±0.08b | 0.515±0.07C* | 0.457±0.06B* | 0.173±0.04A* |
| Velutin           | 0.33±0.13a  | 0.26±0.11a  | 0.64±0.10b  | 0.60±0.12B   | 0.59±0.10B*  | 0.23±0.07A*  |
| Flavonoids        | 0.52±0.18a  | 1.37±0.13b  | 1.15±0.13b  | 2.89±0.0A*   | 3.28±0.05B*  | 2.87±0.27A*  |
| Total polyphenols | 3.33±0.11a  | 3.66±0.04a  | 6.67±0.15b  | 9.65±0.5B*   | 7.79±0.5A*   | 14.05±2.7C*  |
| <b>PAL</b>        | 0.91±0.02b  | 1.10±0.17b  | 0.79±0.01a  | 1.97±0.50A*  | 2.41±0.10A*  | 2.1±0.10A*   |

Values are presented as means ± standard error of 5 independent replicates. Different letters in the same row and the same CO<sub>2</sub> level indicate significant difference at the 0.05 probability level as revealed by Tukey's test. Asterisks indicate significant changes ( $p < 0.05$ ) compared to the corresponding control, as revealed by Student's t-test.

**Supplementary Table S3:** Antioxidant, anti-inflammatory, hypocholesterolemic, anti-cancer and antibacterial activities of the sprouts of three *Lepidium sativum* cultivars grown under either aCO<sub>2</sub> (410 µmol CO<sub>2</sub> mol<sup>-1</sup> air; control) or eCO<sub>2</sub> (620 µmol CO<sub>2</sub> mol<sup>-1</sup> air).

| Parameters                          | aCO <sub>2</sub> |              |             | eCO <sub>2</sub> |              |              |
|-------------------------------------|------------------|--------------|-------------|------------------|--------------|--------------|
|                                     | Haraz            | Rajab        | Khider      | Haraz            | Rajab        | Khider       |
| <b>Antioxidant capacity</b>         |                  |              |             |                  |              |              |
| FRAP                                | 6.45±0.7ab       | 9.25±6.7b    | 5.09±0.2a   | 24.74±1.1A*      | 31.9±3.17A*  | 28.29±8.5A*  |
| ABTS                                | 0.75±0.05a       | 1.48±0.02ab  | 2.05±0.1b   | 1.84±0.2A*       | 1.77±0.03A*  | 2.36±0.1B*   |
| DPPH                                | 7.96±0.5a        | 10.33±0.0b   | 9.04±2.1ab  | 23.24±0.1B*      | 17.6±0.8A*   | 15.61±2.8A*  |
| <b>Anti-inflammatory</b>            |                  |              |             |                  |              |              |
| Anti-cyclooxygenase-2               | 1.14±0.05a       | 1.38±0.03b   | 1.02±0.03a  | 0.76±0.02B*      | 1.49±0.1C    | 0.5±0.03A*   |
| Anti-lipoxygenase                   | 7.39±0.2a        | 7.69±0.4a    | 6.49±0.3a   | 4.8±0.23B*       | 4.22±0.1AB*  | 3.8±0.22A*   |
| <b>Hypocholesterolemic activity</b> |                  |              |             |                  |              |              |
| Inhibition of micellar              | 46.7±5.0b        | 42.9±2.9ab   | 36.4±8.1a   | 60.48±3.8A*      | 59.26±1.9A*  | 67.08±4.2A*  |
| Anti-lipase                         | 2.95±0.27a       | 3.1±0.17a    | 3.79±0.03a  | 2.07±0.15B*      | 1.49±0.1A*   | 2.1±0.29B*   |
| Anti-amylase                        | 1.95±0.1a        | 1.1±0.2a     | 1.9±0.1a    | 0.97±0.2A*       | 1.09±0.1A    | 1.12±0.3A*   |
| <b>Anti-cancer activity</b>         |                  |              |             |                  |              |              |
| Hepatocellular                      | 56.9±1.4a        | 53.8±2.9a    | 50.7±6.9a   | 73.5±4.7B*       | 68.3±1.5AB*  | 63.6±0.7A*   |
| Colon carcinoma                     | 55.1±1.6a        | 68.3±1.5b    | 81.5±3.0c   | 65.5±3.3A*       | 65.8±3.7A    | 76.2±4.7B    |
| Embryonic kidney                    | 49.6±0.9a        | 59.9±2.9b    | 63.6±2b     | 74.1±1.7B*       | 67±2.8A*     | 72.4±2.8AB*  |
| Urinary bladder                     | 51.4±0.7b        | 45.4±2.3a    | 42.8±4.7a   | 72.1±1.7A*       | 82.9±4.7B*   | 76.1±0.4AB*  |
| <b>Anti-bacterial Activity</b>      |                  |              |             |                  |              |              |
| <i>Streptococcus</i> sp.            | 11.23±0.36a      | 13.43±0.59ab | 14.19±0.23b | 23.83±0.08A*     | 29.12±0.5C*  | 26.11±0.17B* |
| <i>Escherichia coli</i>             | 21.7±0.23ab      | 20.38±0.8a   | 23.67±0.7b  | 25.18±0.3AB*     | 32.72±0.9B*  | 21.97±3.3A   |
| <i>Bacillus subtilis</i>            | 15.1±0.33a       | 17.7±0.7b    | 18.73±0.3b  | 19.37±0.6A*      | 30.07±0.9B*  | 20.82±4.6A   |
| <i>Pseudomonas aeruginosa</i>       | 16.18±0.4ab      | 14.51±0.2a   | 18.33±0.3b  | 22.78±0.6A*      | 25.25±0.16B* | 22.79±0.5A*  |
| <i>Sarcina lutea</i>                | 17.09±0.5a       | 23.4±1.02b   | 24.72±0.4b  | 29.95±0.4B*      | 31.82±0.9B*  | 26.75±0.4A   |

Values are presented as means ± standard error of 5 independent replicates. Different letters in the same row and the same CO<sub>2</sub> level indicate significant difference at the 0.05 probability level as revealed by Tukey's test. Asterisks indicate significant changes ( $p < 0.05$ ) compared to the corresponding control, as revealed by Student's t-test.
